# Supplementary material for: Fabrication of a three-dimensional visible-light-driven Ag–AgBr/TiO2/graphene aerogel composite for enhanced photocatalytic destruction of organic dyes and bacteria
Source: Royal Society of Chemistry journal article supplement (doi:10.1039/c8nj06057f), 2019-01-01
Supplement: c8nj06057f1.pdf [file c8nj06057f1.pdf]

# Fabrication of a three-dimensional visible-light-driven Ag-AgBr/TiO<sub>2</sub>/graphene aerogel composite for enhanced photocatalytic destruction of organic dye and bacteria

Mingjing Zhang,<sup>a</sup> Yuexing Chen,<sup>a</sup> Bangjie Chen,<sup>a</sup> Yunsong Zhang,<sup>a</sup> Li Lin,<sup>a</sup> Xiaowen Han,<sup>a</sup> Ping Zou,<sup>a</sup> Guangtu Wang,<sup>a</sup> Jun Zeng,<sup>b</sup> Maojun Zhao<sup>\*a</sup>

<sup>a</sup>College of Science, Sichuan Agricultural University, Yaan 625014, China

<sup>b</sup>Key Laboratory of Green Chemistry of Sichuan Institutes of Higher Education, Sichuan University of Science Engineering, Zigong 643002, China

\*Corresponding author. E-mail address: Zhaomj\_sicau@126.com

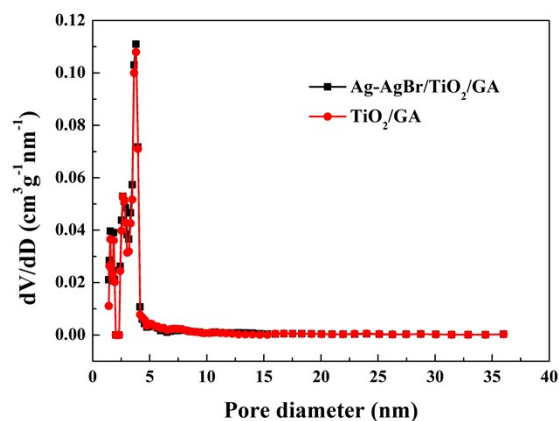

Fig. S1. pore size distributions of TiO<sub>2</sub>/GA and Ag-AgBr/TiO<sub>2</sub>/GA.

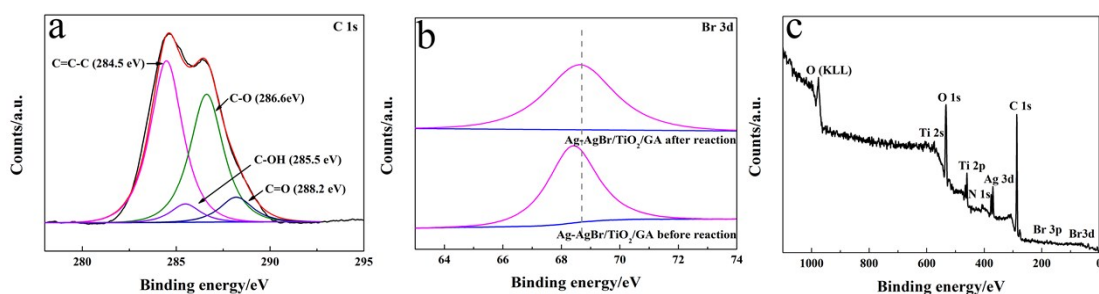

Fig. S2. (a) high-resolution XPS spectra of the C 1s regions for the GO. (b) high-resolution XPS spectra of the Br 3d regions for the Ag-AgBr/TiO<sub>2</sub>/GA. (c) Full-scale XPS survey spectrum for the Ag-AgBr/TiO<sub>2</sub>/GA.

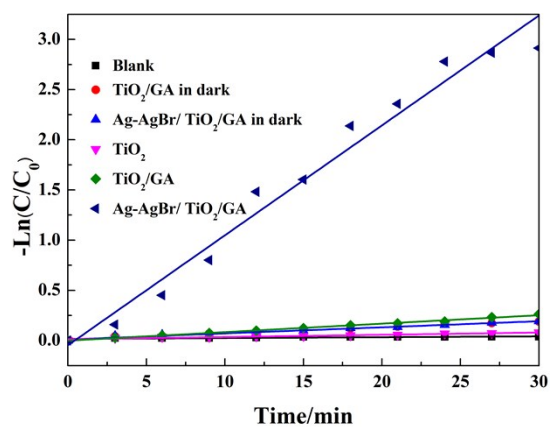

Fig. S3. Kinetic curves of the photocatalytic degradation for asprepared catalysts.

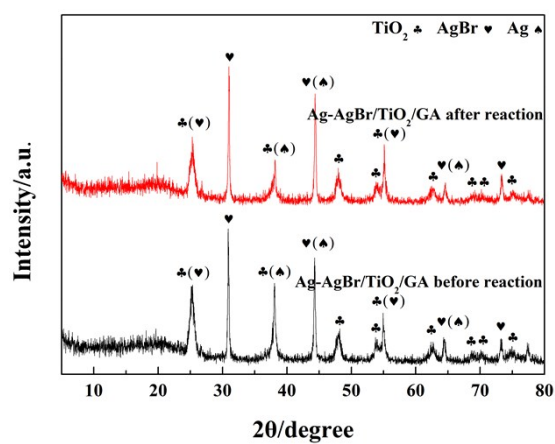

Fig. S4. XRD spectra of the Ag-AgBr/TiO<sub>2</sub>/GA before and after the repeated photocatalytic reactions.

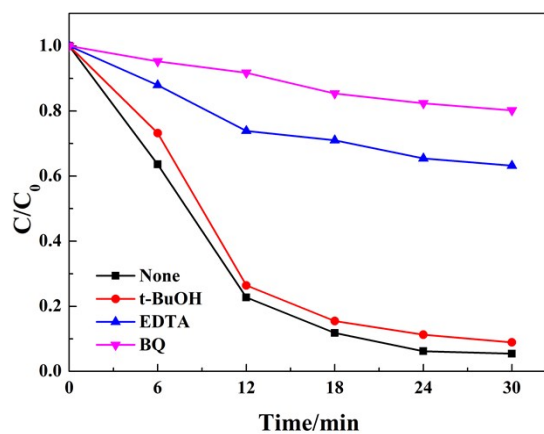

Fig. S5. The photocatalytic activity of the Ag-AgBr/TiO<sub>2</sub>/GA towards MO degradation with different scavengers under visible light irradiation.
